# Supplementary material
Source: PubMed Central journal article supplement (PMC8168342)

## Supporting Information

### Isothiocyanate-Containing Hybrid Androgen Receptor (AR) Antagonist Downregulates AR and Induces Ferroptosis in GSH-Deficient Prostate Cancer Cells

Zhihui Qin,<sup>[a]\*</sup> Siyu Ou,<sup>[a],#</sup> Liping Xu,<sup>[a],#</sup> Kathleen Sorensen,<sup>[a]</sup> Yingxue Zhang,<sup>[b]</sup> Zhe Yang,<sup>[b]</sup>

Wen-Yang Hu,<sup>[c]</sup> Fei Chen<sup>[a]</sup> and Gail S. Prins<sup>[c]</sup>

#### Table of Contents

**Figure S1.** The predicted interactions of **12a** and **13** with AR. Page 3.

**Figure S2.** Deferential selectivity of **13** and **12b** in cell culture. Page 4.

**Table S1.** The calculated interaction index of **13** and BSO in treating VCaP and 22Rv1 cells. Page 4.

**Figure S3.** **13** and BSO combination induces ferroptosis in PCa cells. Page 5.

#### <sup>1</sup>H, <sup>13</sup>C-NMR and HRMS spectra of the synthetic products

|                                                     | Page# |
|-----------------------------------------------------|-------|
| <sup>1</sup> H, <sup>13</sup> C-NMR <b>3a</b> ..... | 6     |
| <sup>1</sup> H, <sup>13</sup> C-NMR <b>3b</b> ..... | 7     |
| <sup>1</sup> H, <sup>13</sup> C-NMR <b>4a</b> ..... | 8     |
| <sup>1</sup> H, <sup>13</sup> C-NMR <b>4b</b> ..... | 9     |
| <sup>1</sup> H, <sup>13</sup> C-NMR <b>5a</b> ..... | 10    |
| <sup>1</sup> H, <sup>13</sup> C-NMR <b>5b</b> ..... | 11    |
| <sup>1</sup> H, <sup>13</sup> C-NMR <b>7a</b> ..... | 12    |
| <sup>1</sup> H, <sup>13</sup> C-NMR <b>7b</b> ..... | 13    |
| <sup>1</sup> H, <sup>13</sup> C-NMR <b>9a</b> ..... | 14    |

|                                                      |        |
|------------------------------------------------------|--------|
| $^1\text{H}$ , $^{13}\text{C}$ -NMR <b>9b</b> .....  | 15     |
| $^1\text{H}$ , $^{13}\text{C}$ -NMR <b>10a</b> ..... | 16     |
| $^1\text{H}$ , $^{13}\text{C}$ -NMR <b>10b</b> ..... | 17     |
| HRMS <b>10b</b> .....                                | 18     |
| $^1\text{H}$ , $^{13}\text{C}$ -NMR <b>11a</b> ..... | 18, 19 |
| $^1\text{H}$ , $^{13}\text{C}$ -NMR <b>11b</b> ..... | 19, 20 |
| HRMS <b>11b</b> .....                                | 20     |
| $^1\text{H}$ , $^{13}\text{C}$ -NMR <b>12a</b> ..... | 21     |
| $^1\text{H}$ , $^{13}\text{C}$ -NMR <b>12b</b> ..... | 22     |
| HRMS <b>12b</b> .....                                | 23     |
| $^1\text{H}$ , $^{13}\text{C}$ -NMR <b>13</b> .....  | 23, 24 |
| HRMS <b>13</b> .....                                 | 24     |

**Figure S1. The predicted interactions of 12a (A) and 13 (B) with AR.** Both compounds form identical hydrogen bonds and  $\pi$ - $\pi$  interaction with AR, compared to **12b**. Homology model was constructed by aligning the agonistic form of AR (2AMB) with glucocorticoid receptor antagonistic conformation (1NHZ). Docked **12a** and **13** are colored in blue and yellow, respectively. Drug-interacting AR residues are depicted as sticks. Dashed lines indicate hydrogen bonds.

**A.**

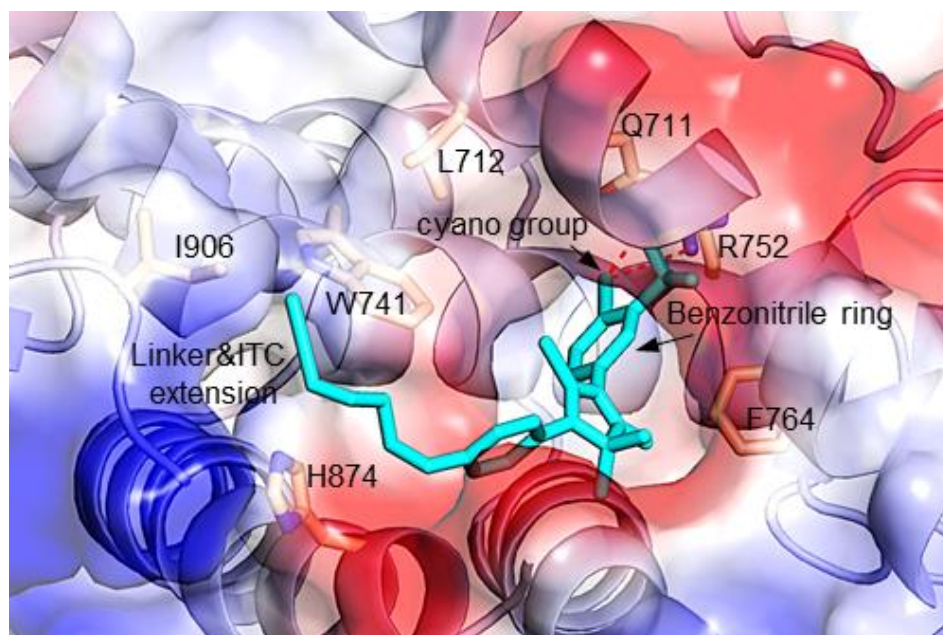

**B.**

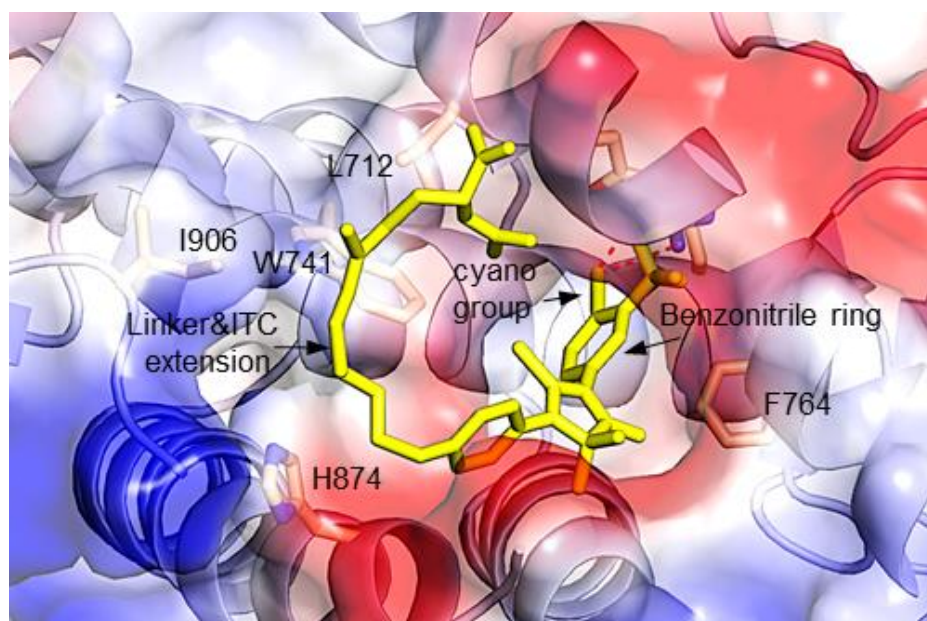

**Figure S2. Differential selectivity of 13 and 12b in cell culture.** LNCaP and RWPE-1 cells were treated with **12b** or **13** for 72 h, respectively. Cell viability was measured using MTT assay. ns, not significant; \*\*, P<0.01; \*\*\*\*, P<0.0001.

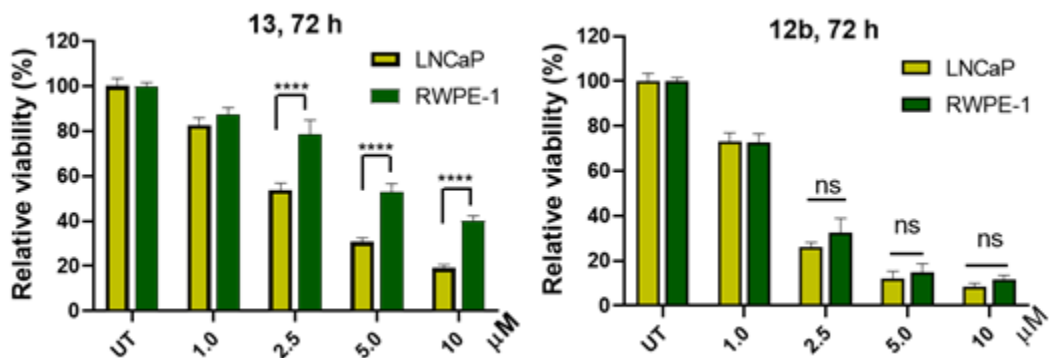

**Table S1. The calculated interaction index of 13 and BSO in treating VCaP and 22Rv1 cells.** The interaction index is defined as (% viable cells treated with drug combination)/[(% viable cells treated with drug 1)×(% viable cells treated with drug 2)]. Cells were pretreated with BSO for 16 h, followed by the co-treatment for 24 h. Viability was assessed using MTT assay.

**Interaction Index (VCaP)**

| 2-63 (μM) | BSO (μM) |      |      |
|-----------|----------|------|------|
|           | 2.5      | 5    | 10   |
| 1         | 0.83     | 0.81 | 0.70 |
| 2.5       | 0.62     | 0.46 | 0.42 |
| 5         | 0.43     | 0.34 | 0.33 |

**Interaction Index (22Rv1)**

| 2-63 (μM) | BSO (μM) |      |      |
|-----------|----------|------|------|
|           | 2.5      | 5.0  | 10   |
| 2.5       | 0.81     | 0.70 | 0.67 |
| 5.0       | 0.63     | 0.60 | 0.60 |
| 10        | 0.70     | 0.68 | 0.66 |

**Figure S3. 13 and BSO combination induces ferroptosis in PCa cells. 13 plus BSO-caused viability loss is rescued by antioxidants, iron chelator and HO-1 inhibitor.** VCaP (A) or 22Rv1 (B) cells were treated with **13** (VCaP, 2.5  $\mu$ M; 22Rv1, 5  $\mu$ M), DFO (10  $\mu$ M),  $\alpha$ -Tocopherol ( $\alpha$ -Toc, 100  $\mu$ M), ferrostatin-1 (Fer-1, 0.5  $\mu$ M) or ZnPP (3  $\mu$ M) individually or in combination for 24 h. BSO (10  $\mu$ M) was added 16 h prior to other agents. Values stand for mean $\pm$ SD (n=6-8). \*\*\*\*, P<0.0001. Cell viability was assessed using MTT assay.

A.

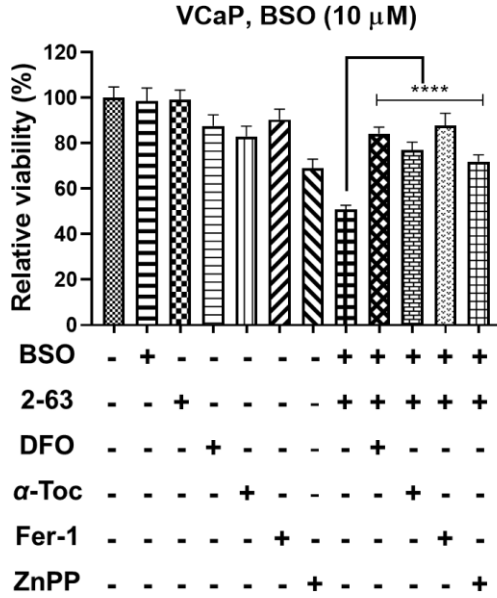

B.

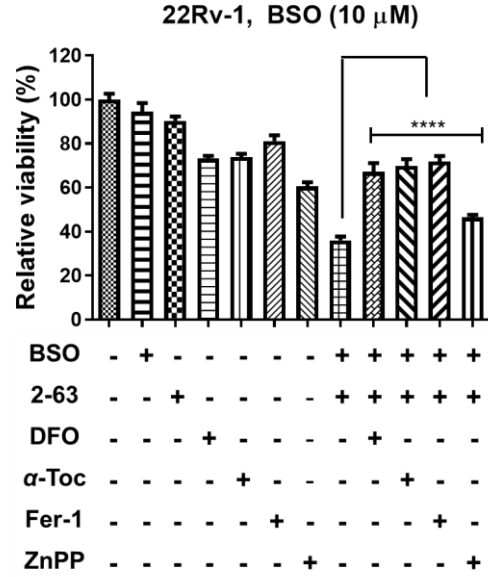

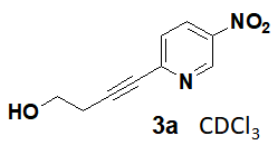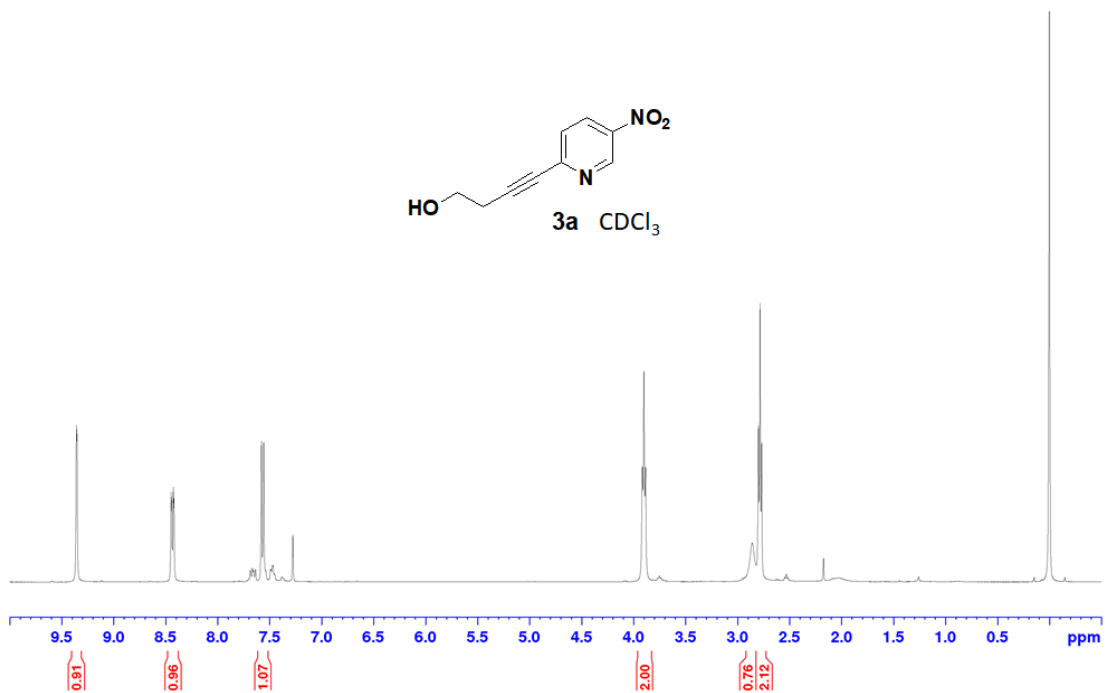

148.70  
 145.27  
 142.64

131.43  
 126.89

94.25

80.91  
 77.38  
 77.06  
 76.74

60.46

23.98

0.00

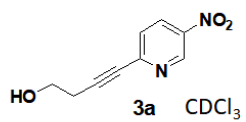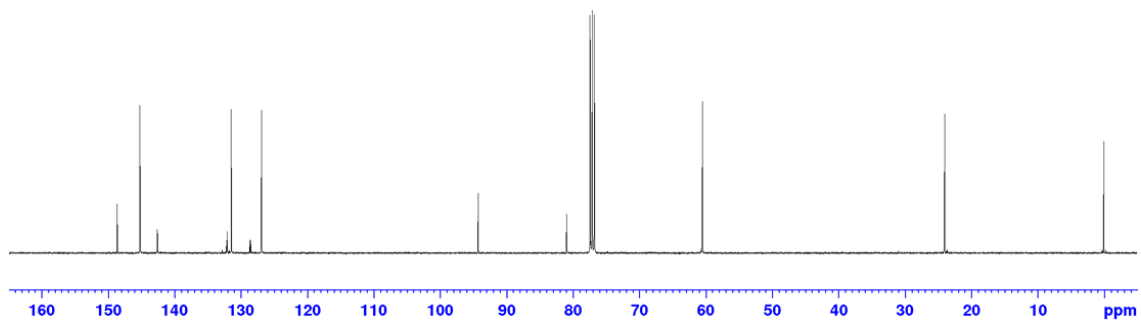

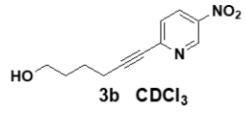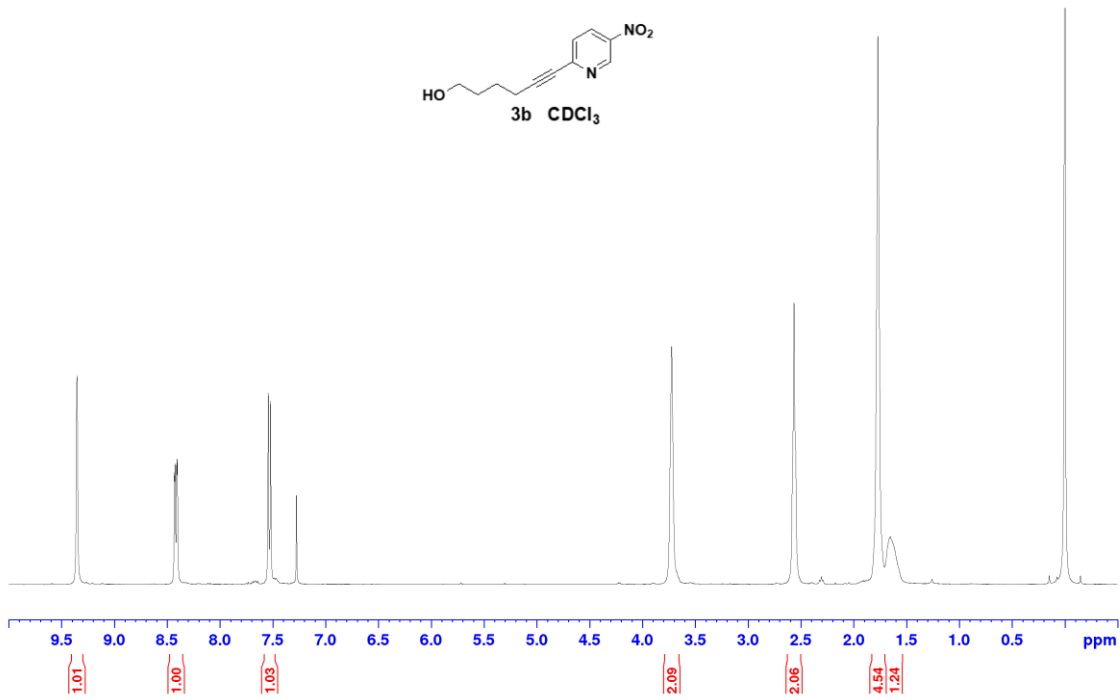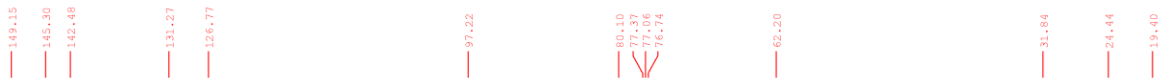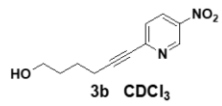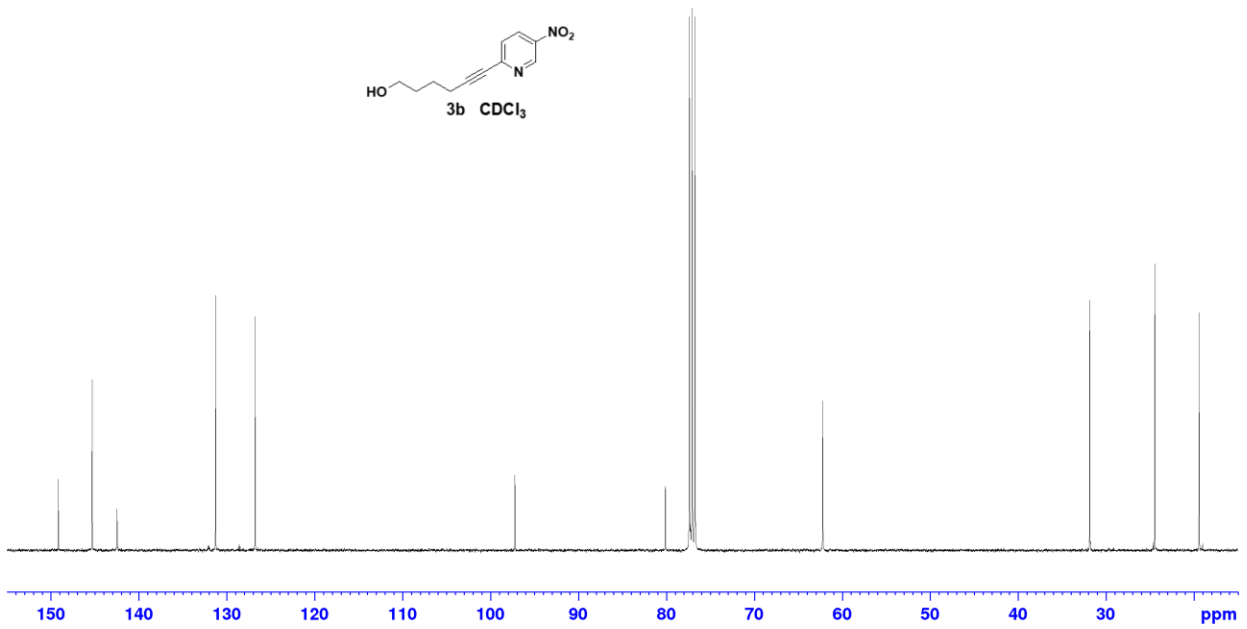

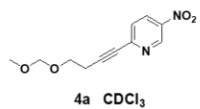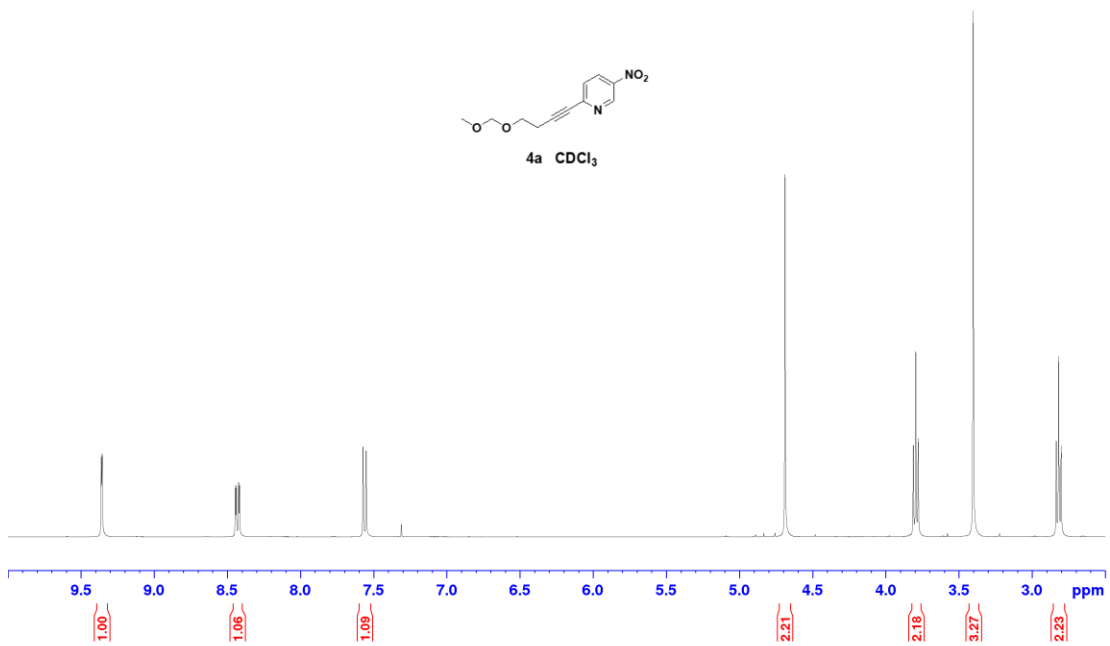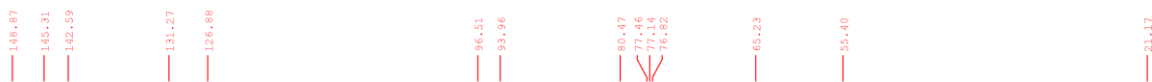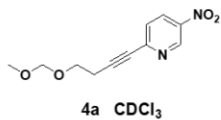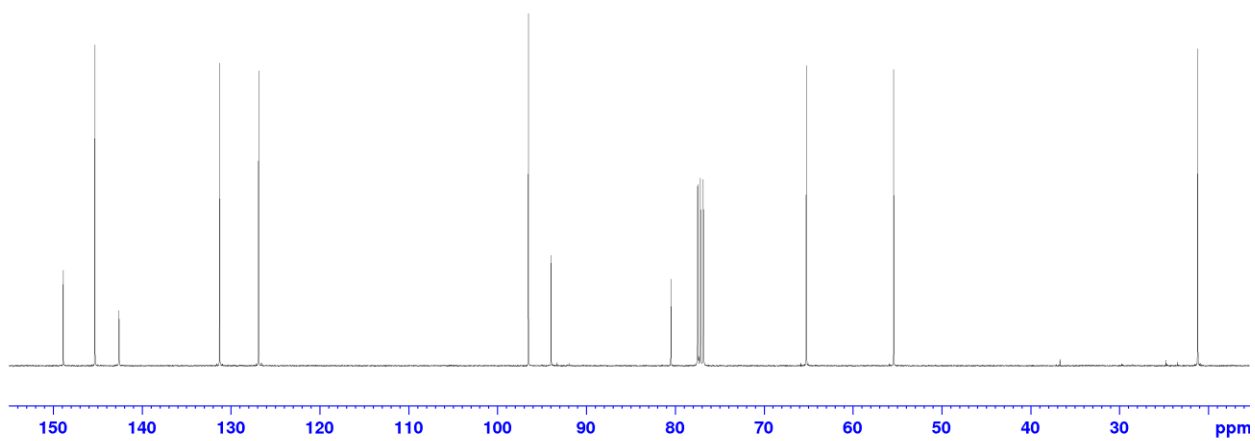



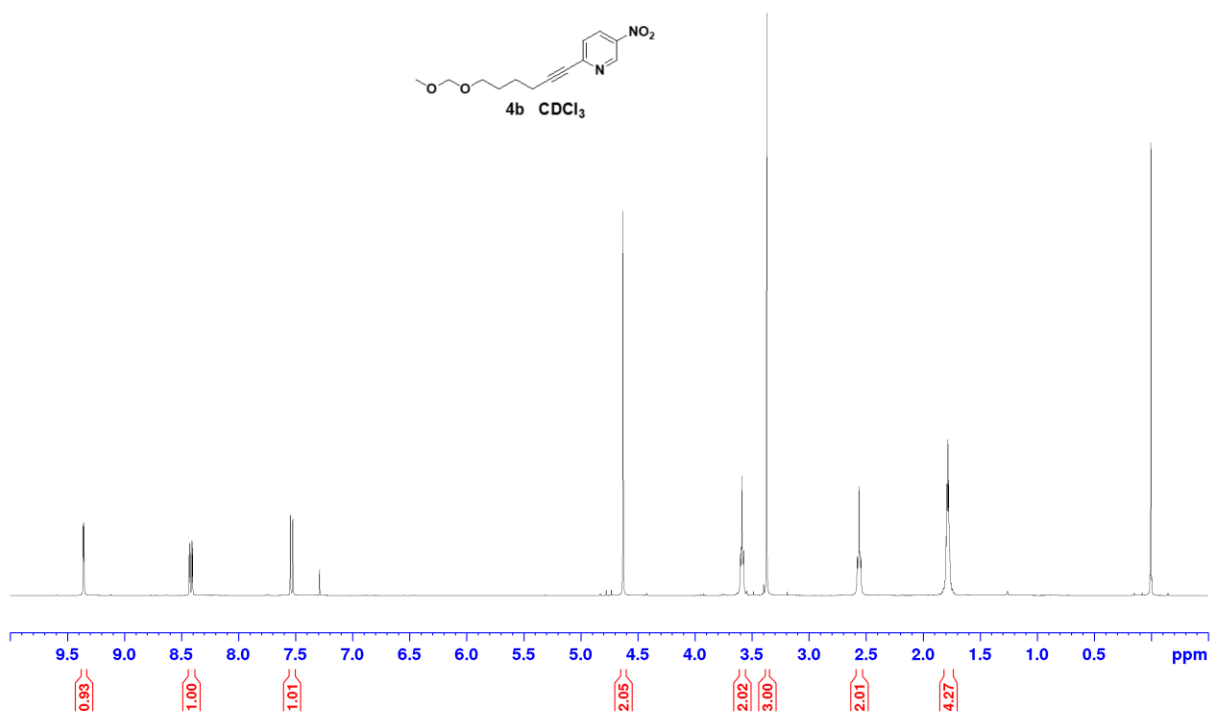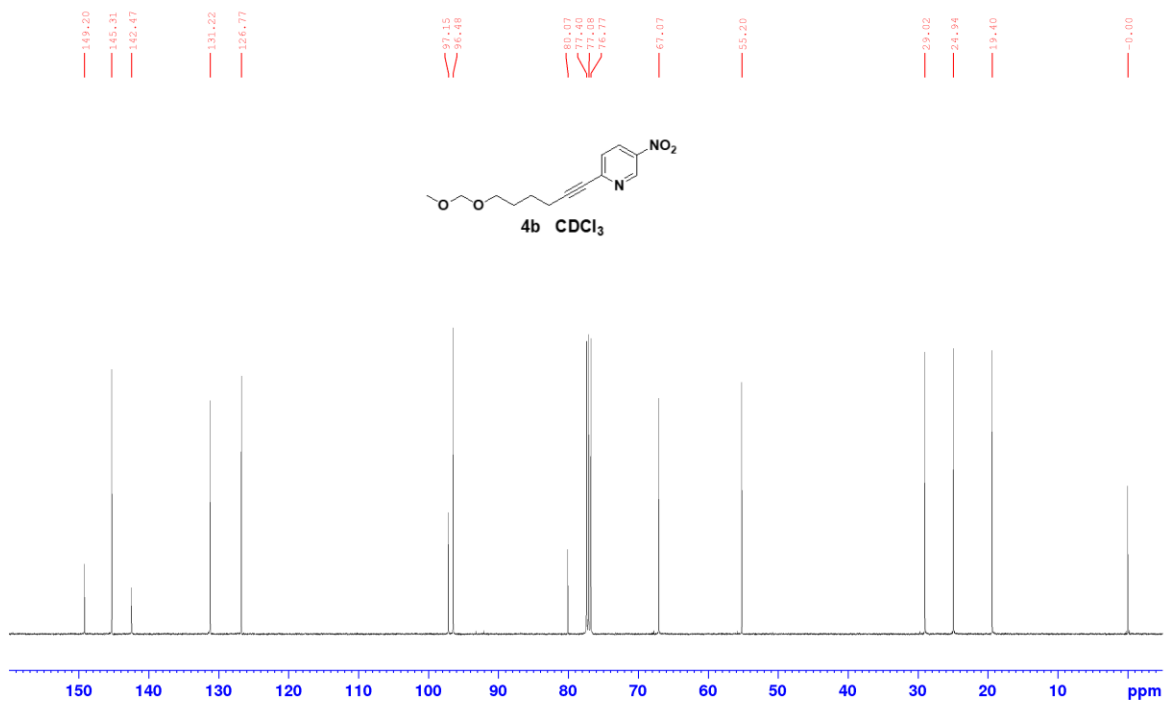

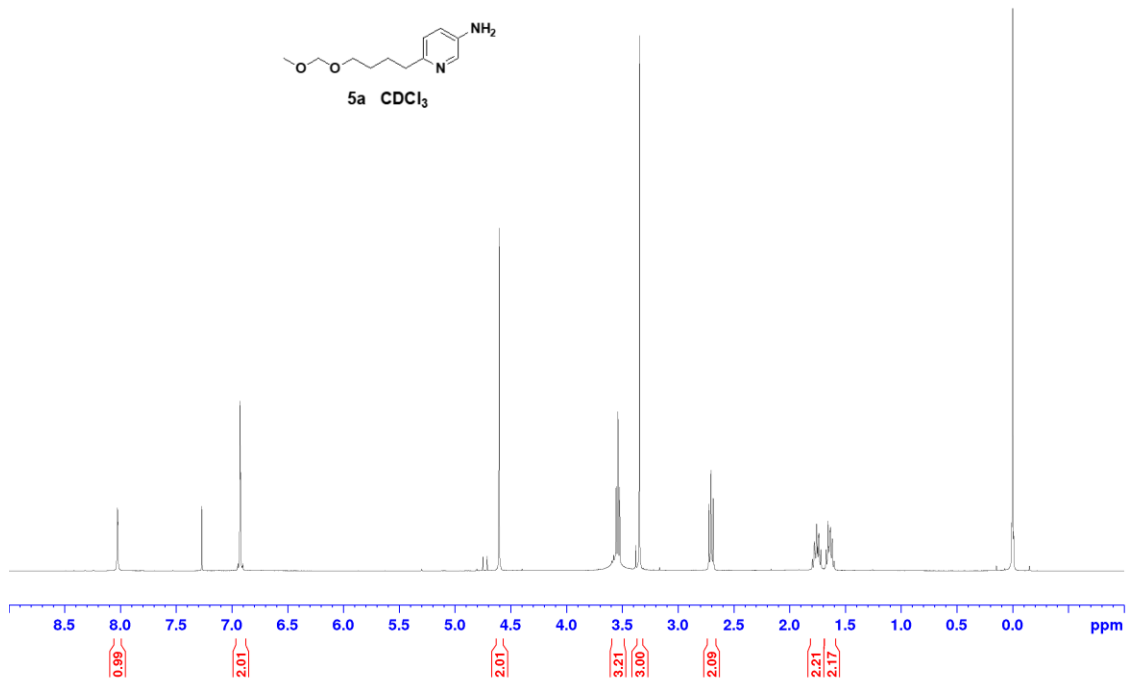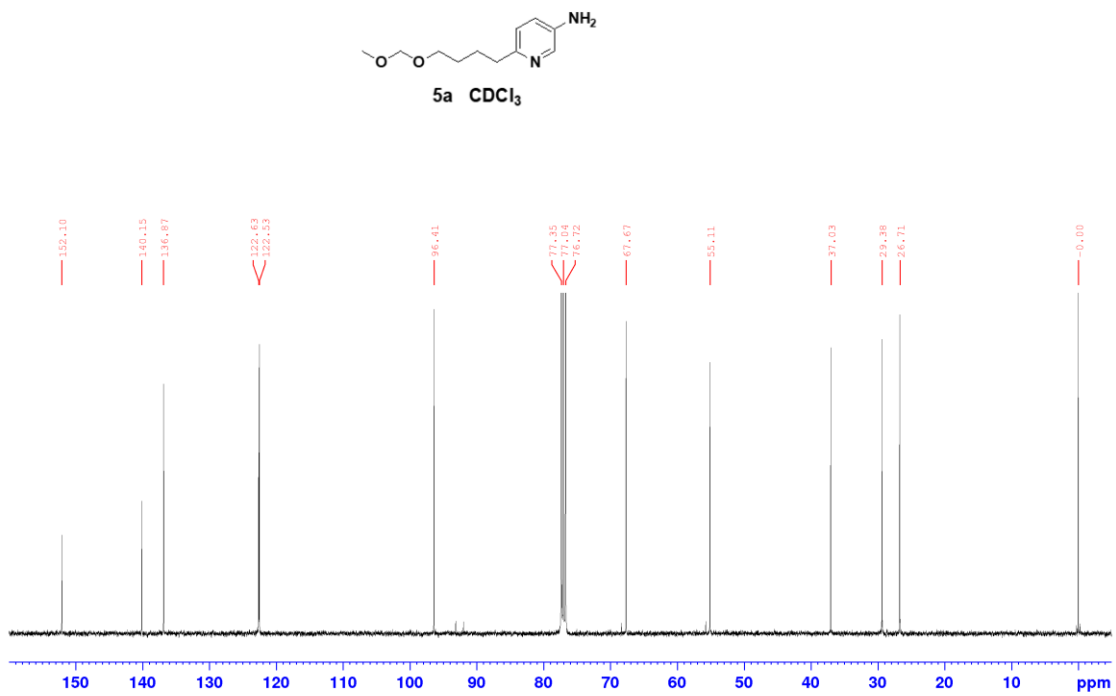

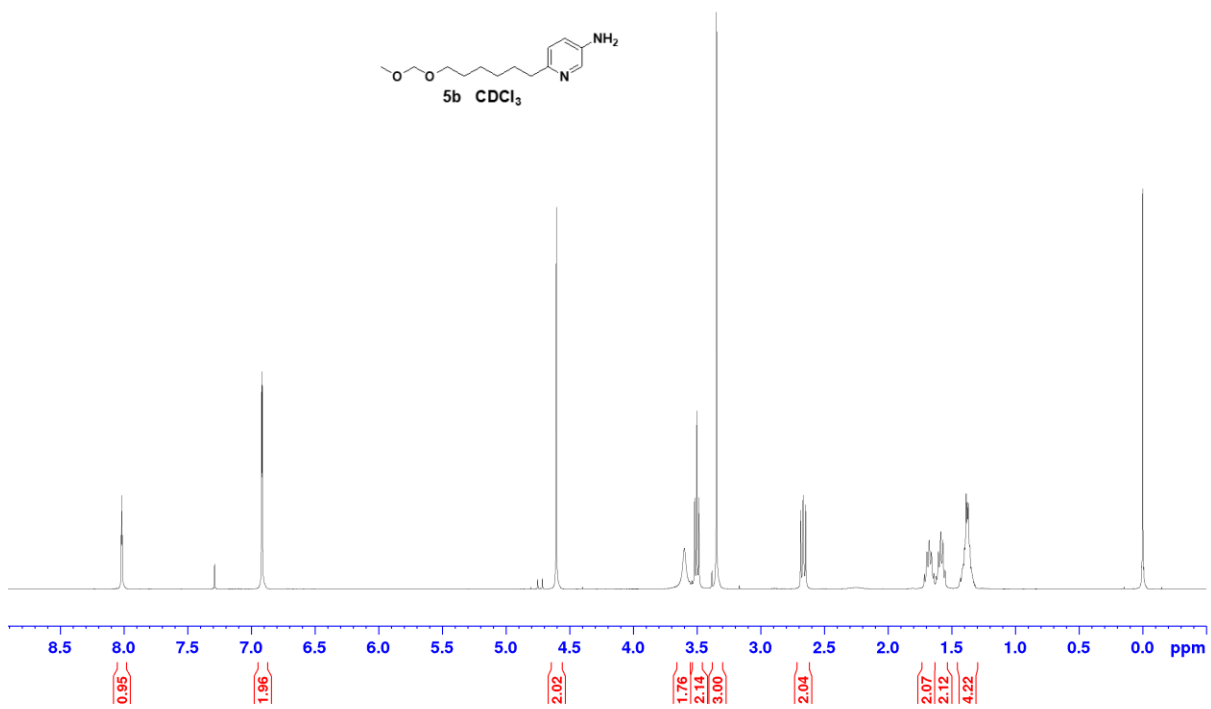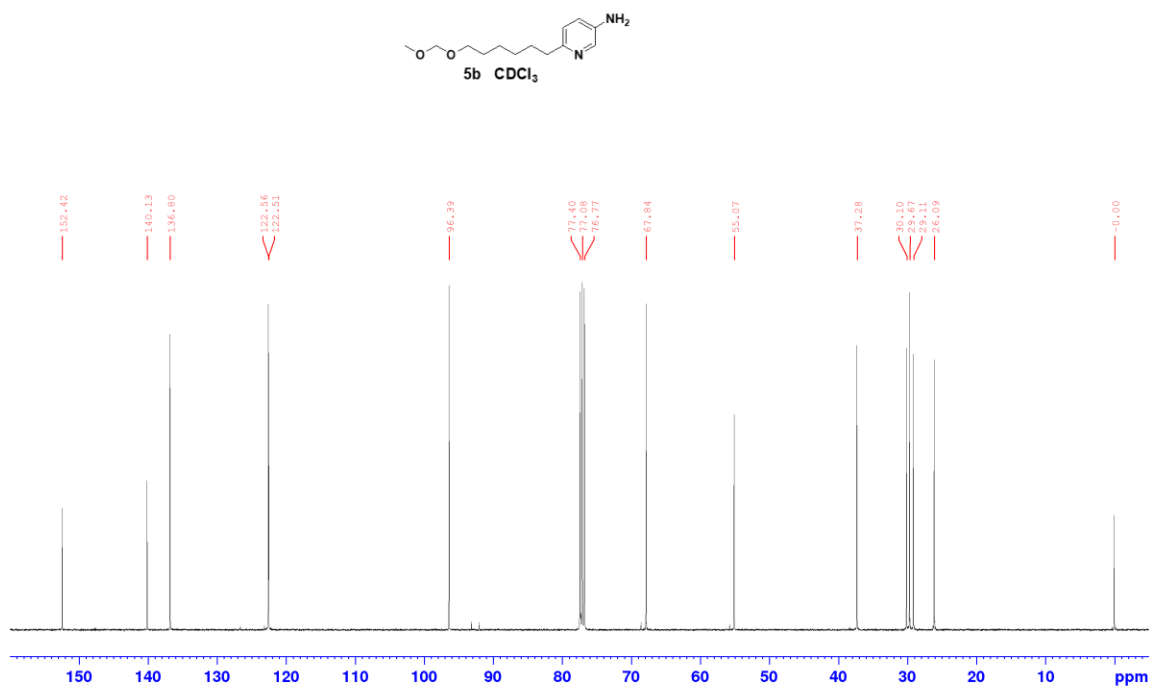

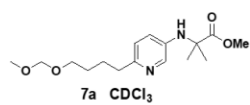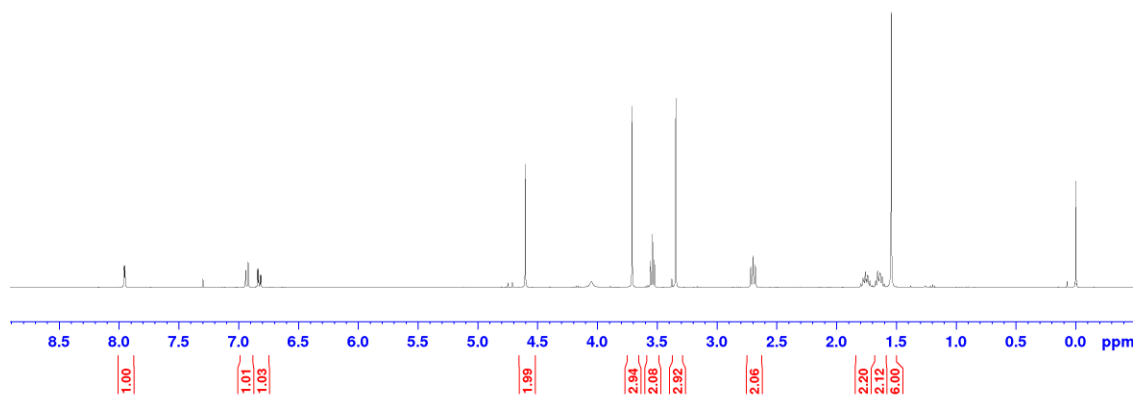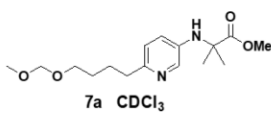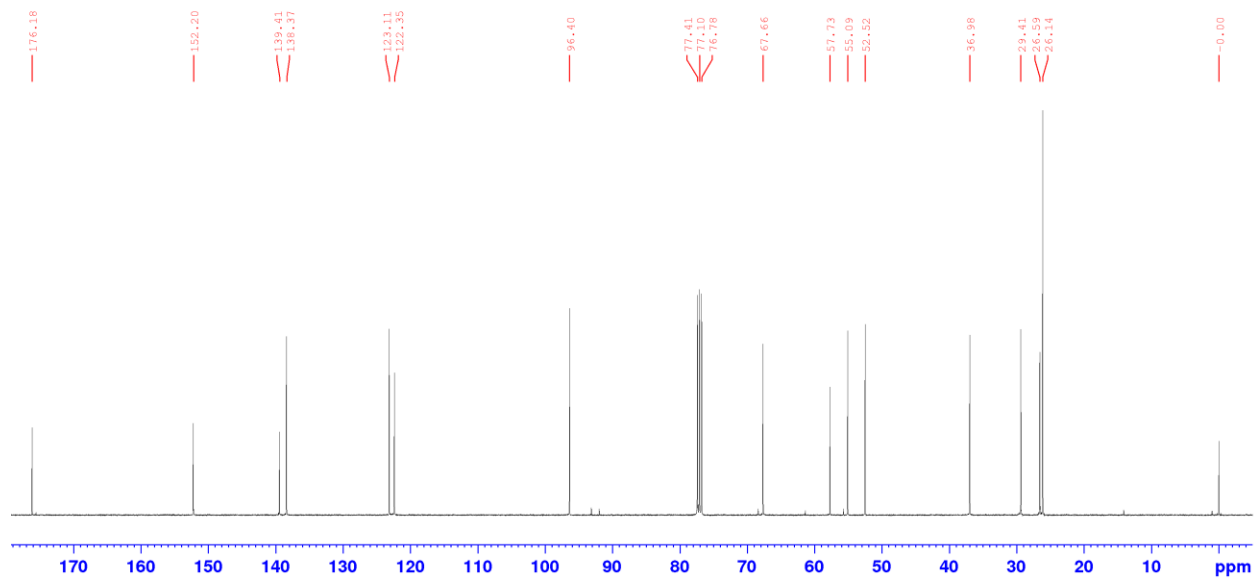

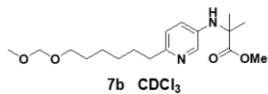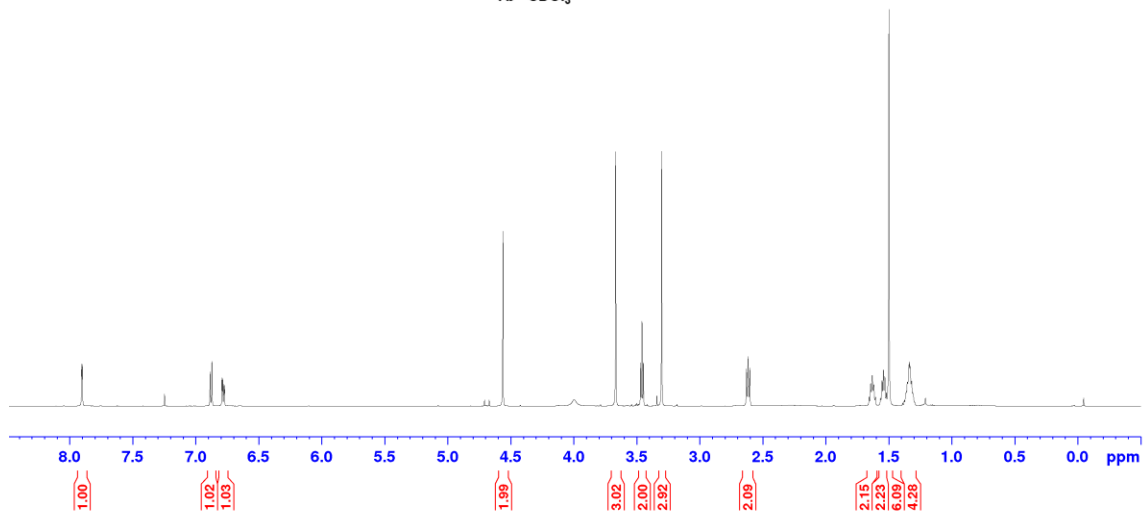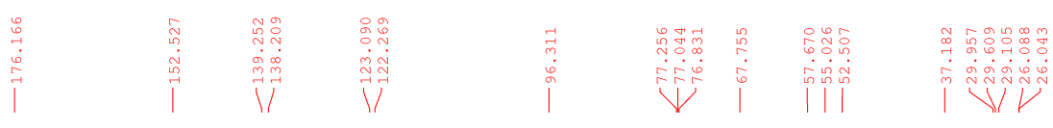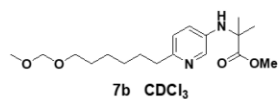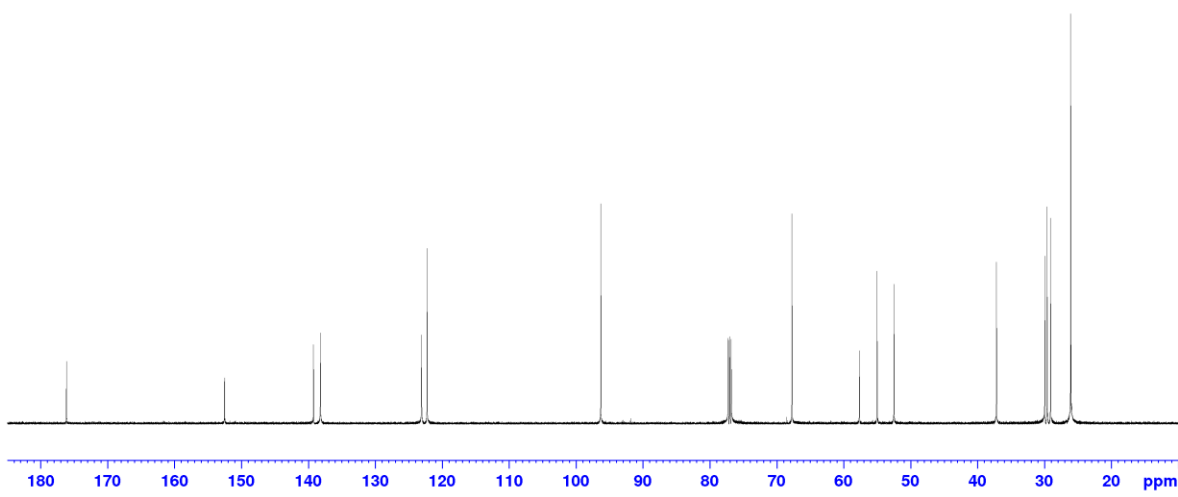

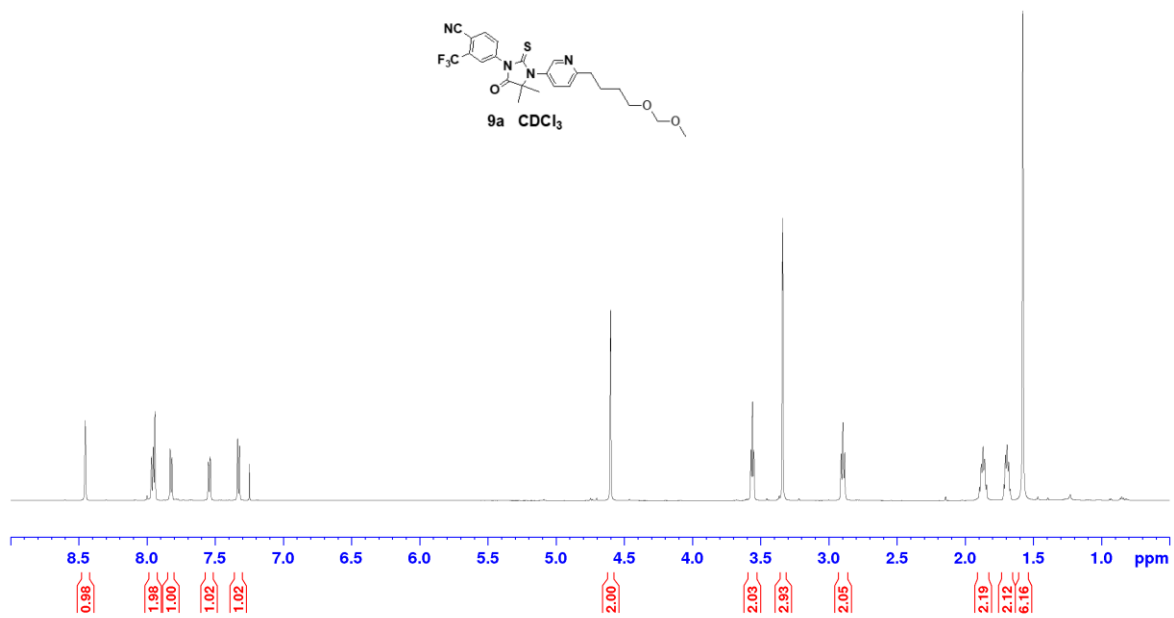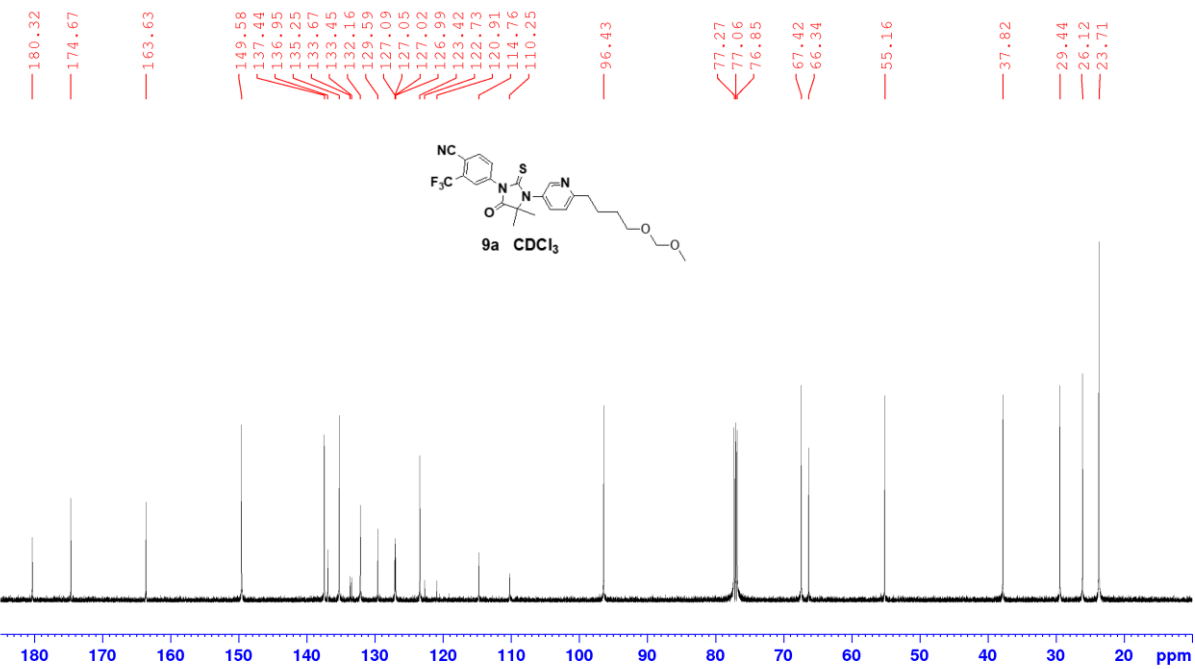

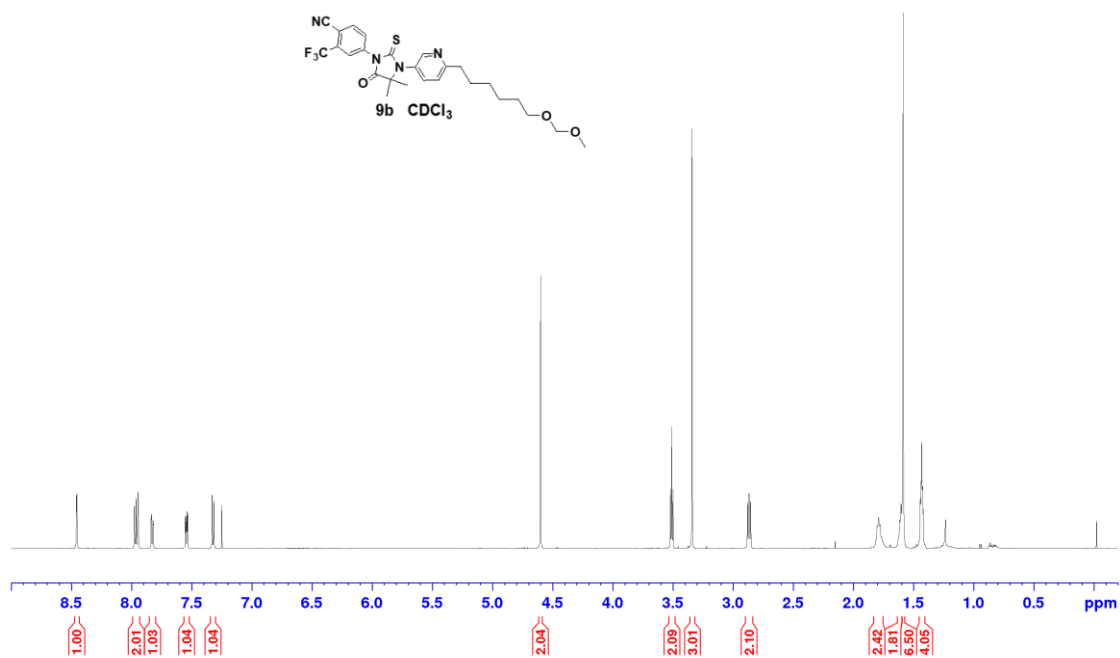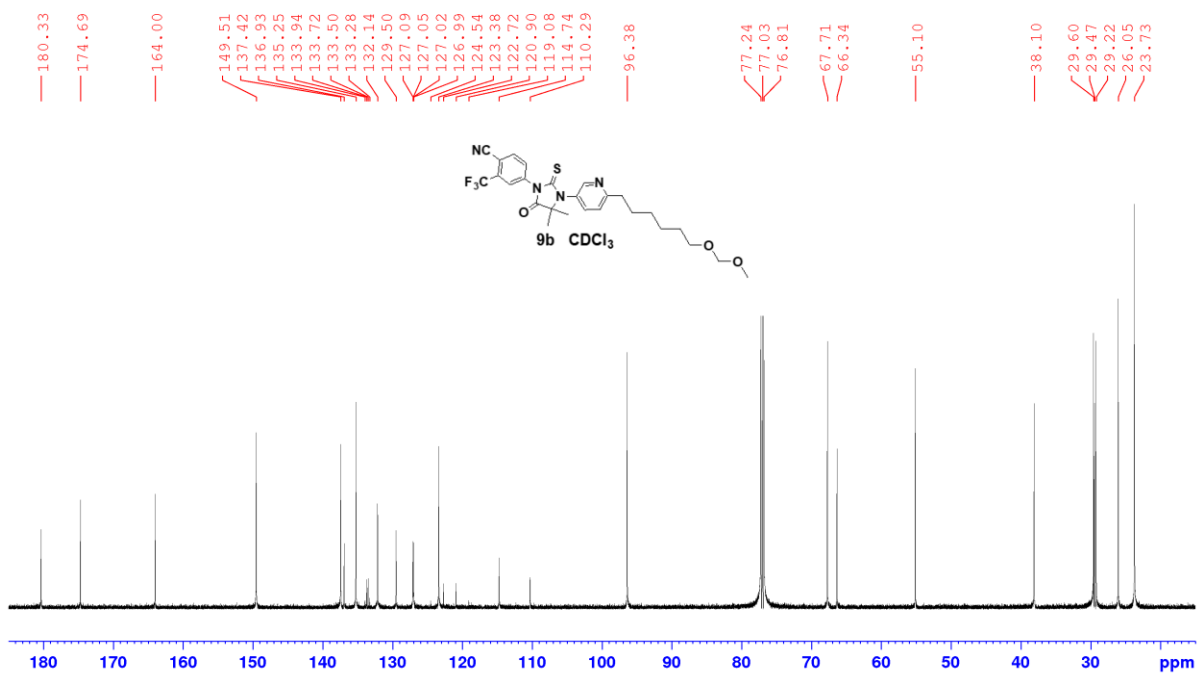

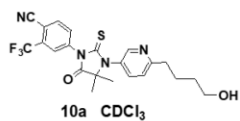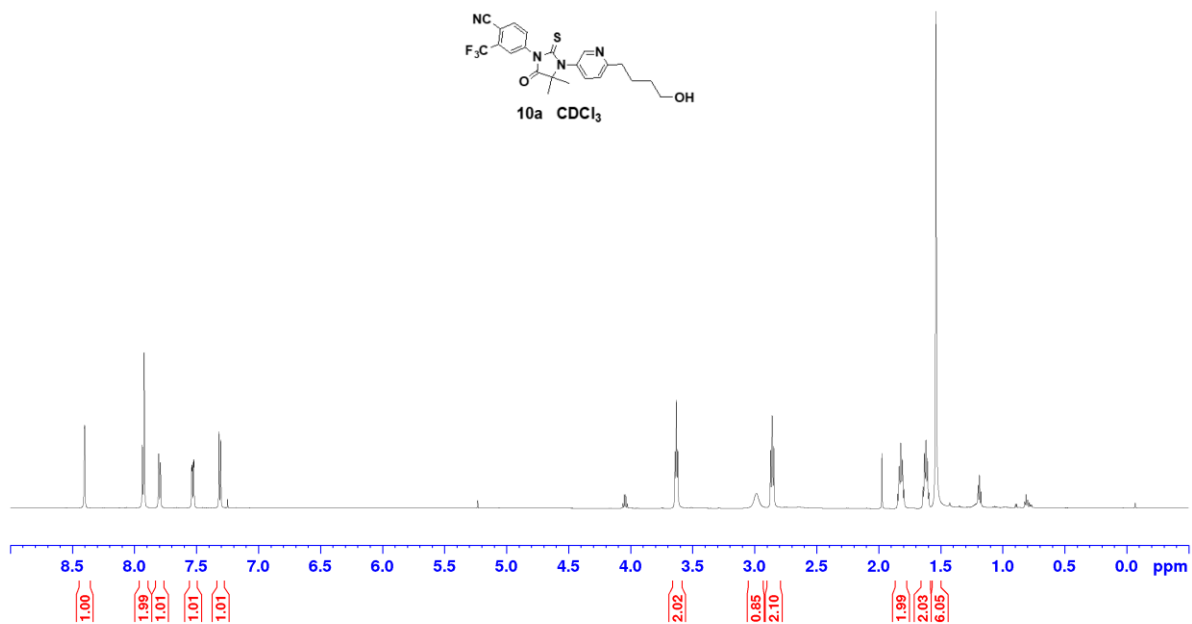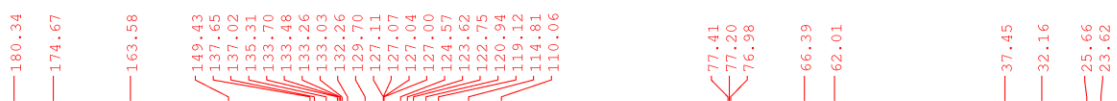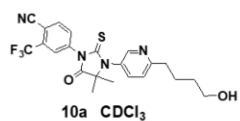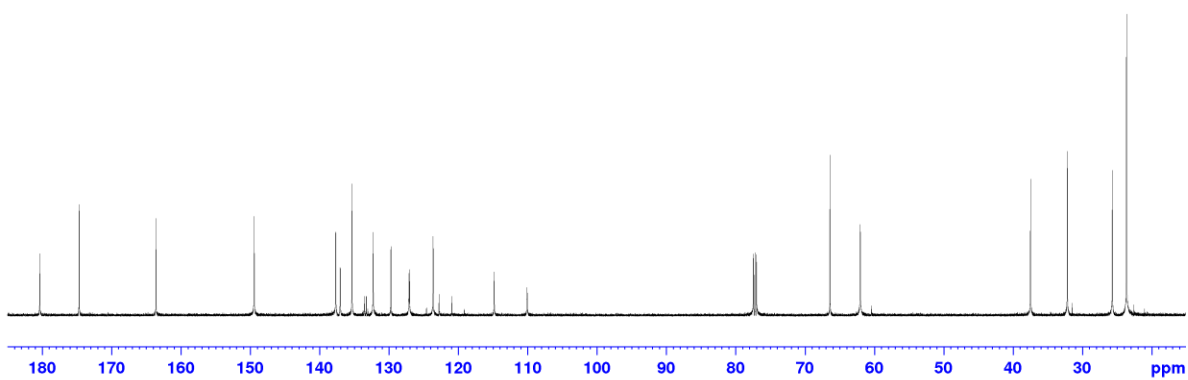



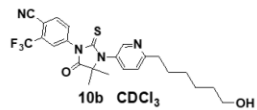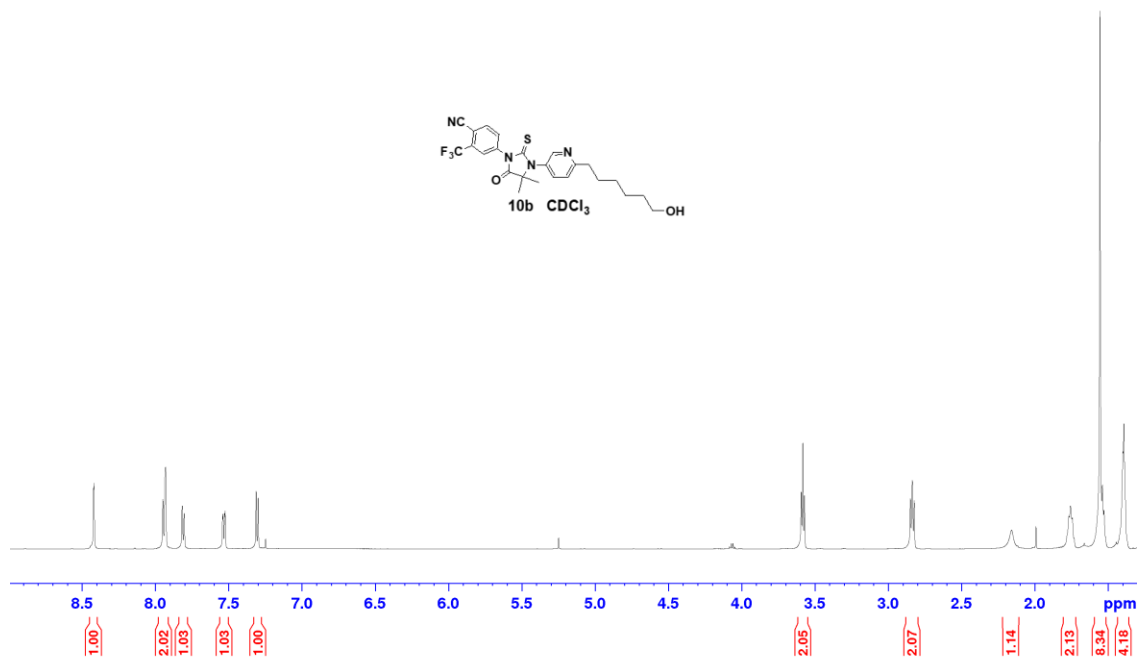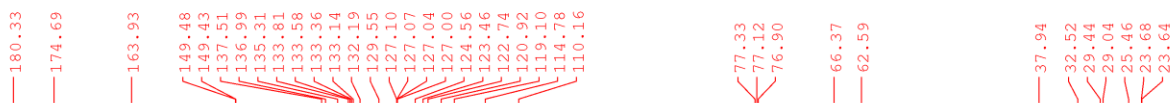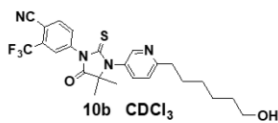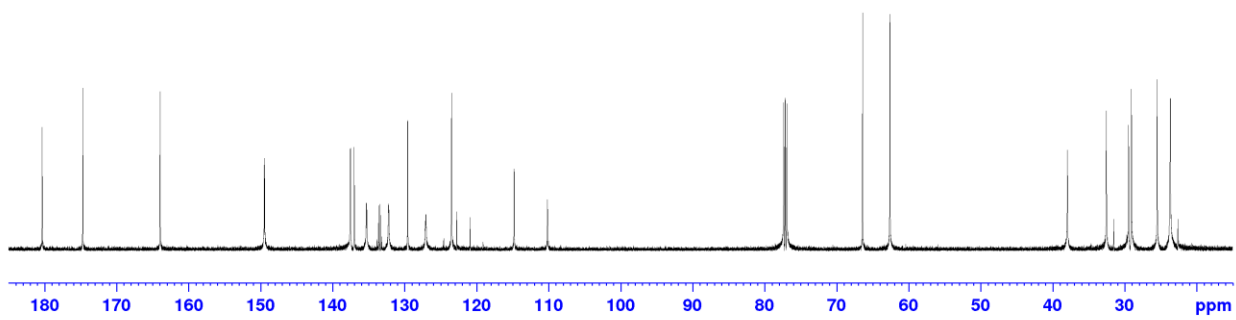

160805\_271 697 (12.885) Cm ((697+778:780+804:805)-111:163x2.000)

TOF MS ES+  
6.07e4

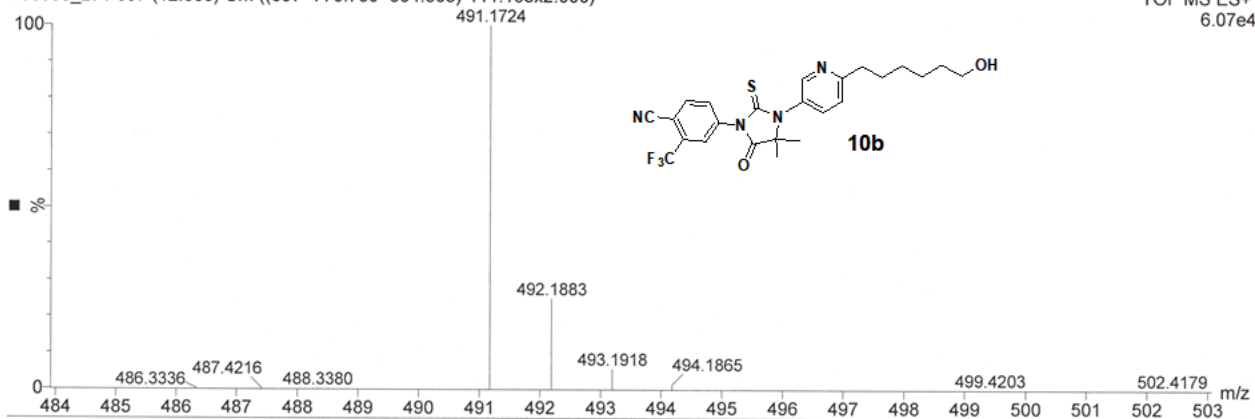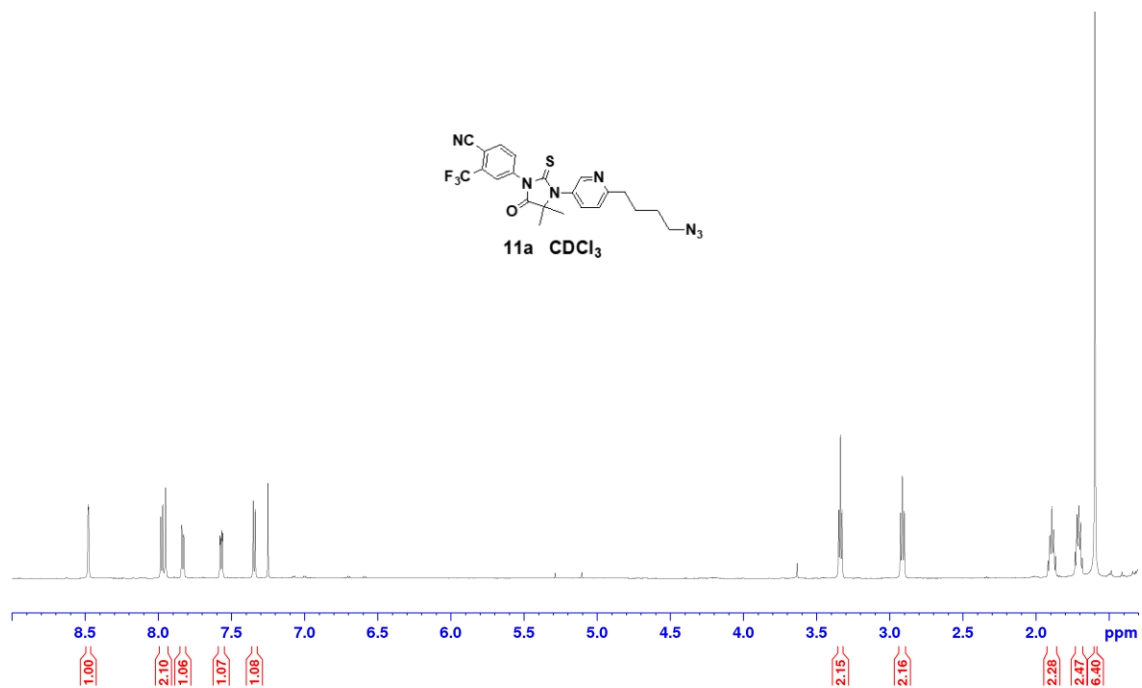

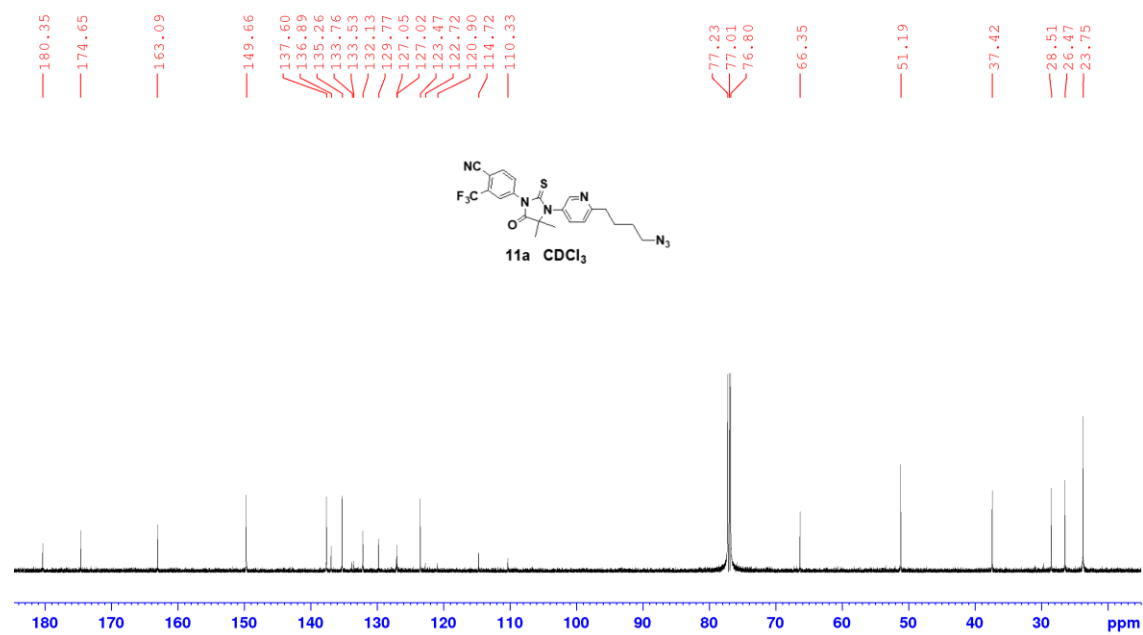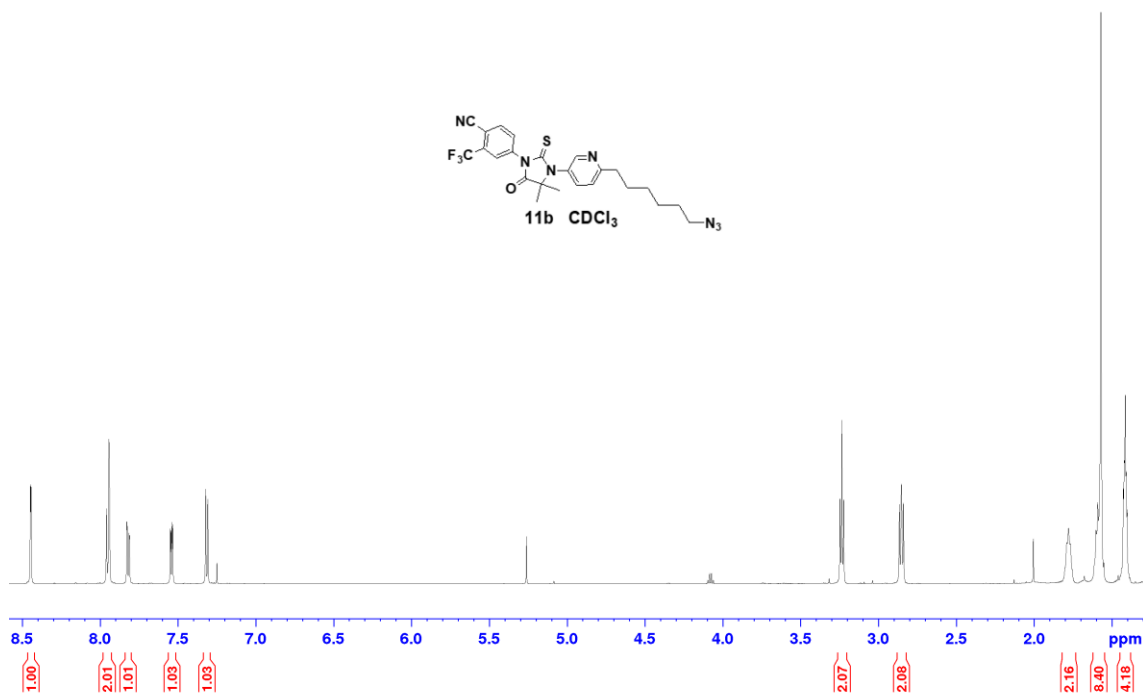

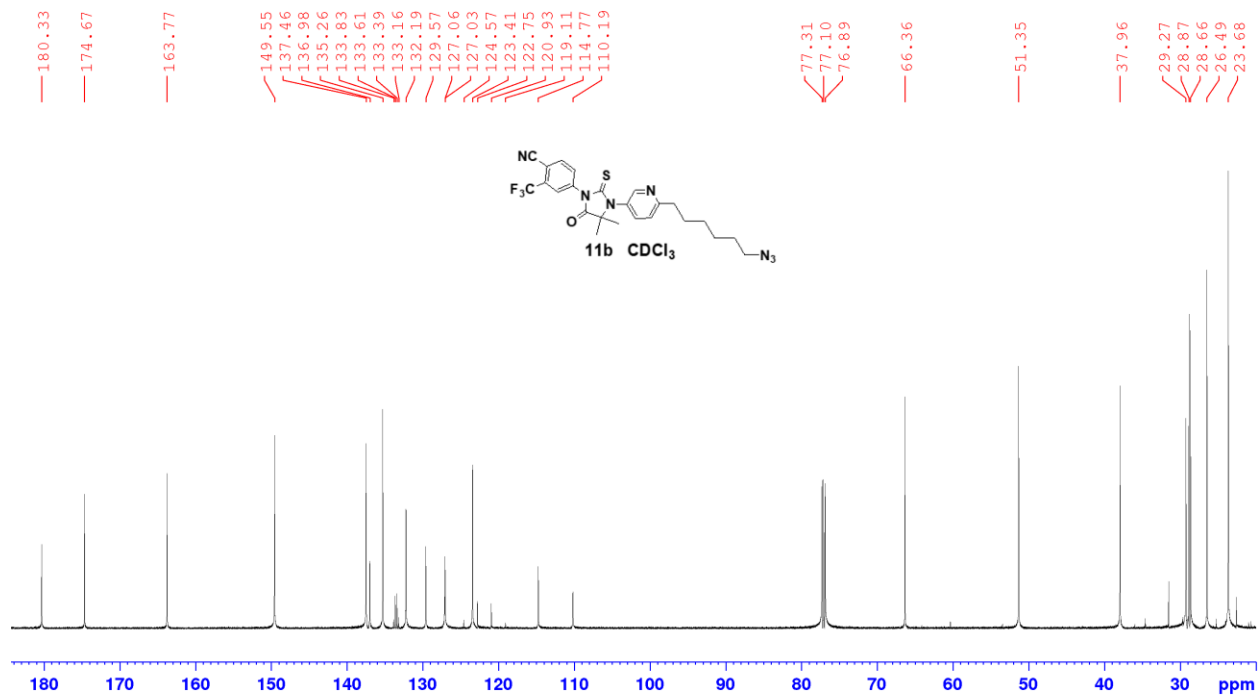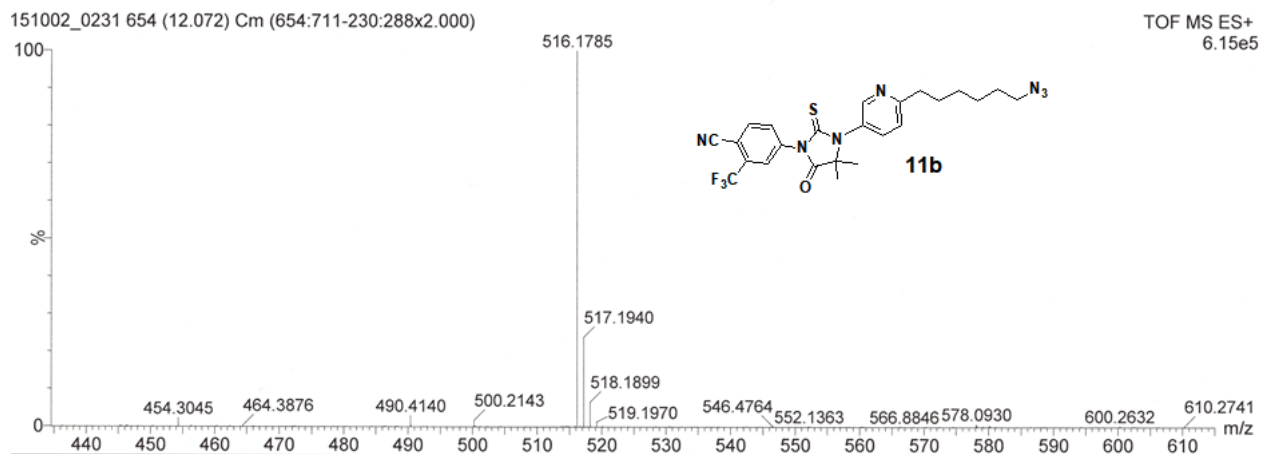

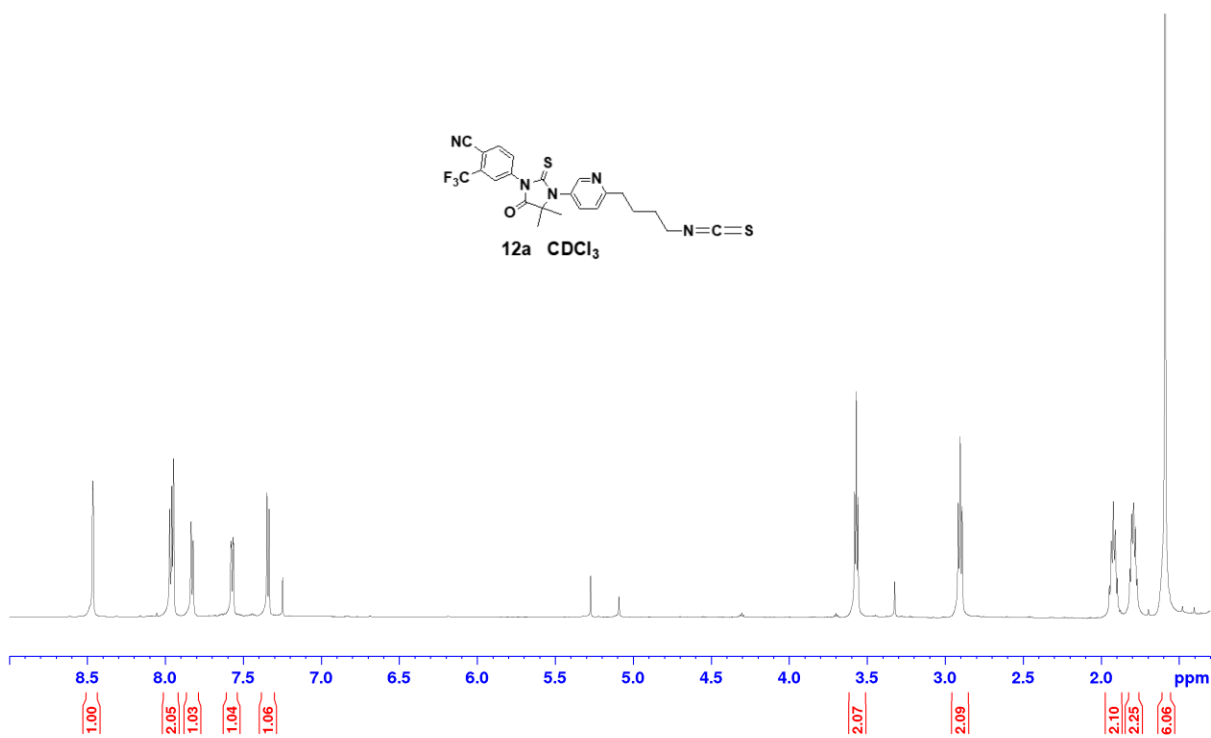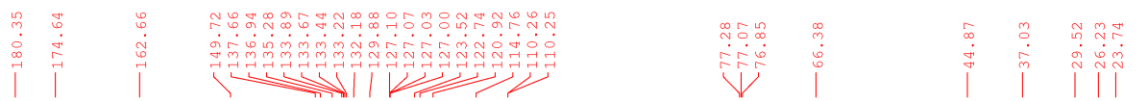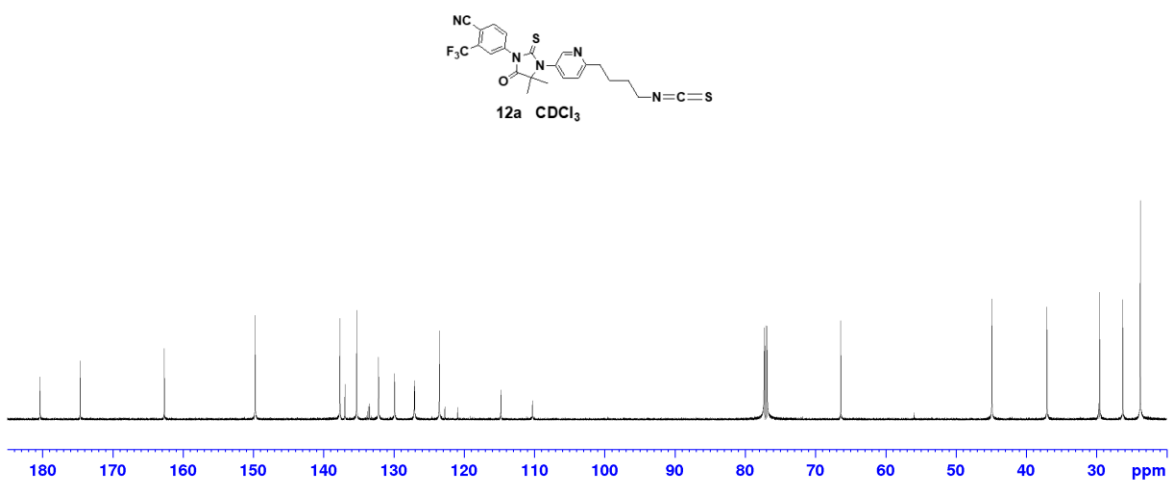

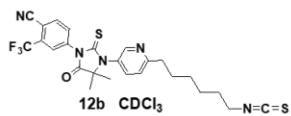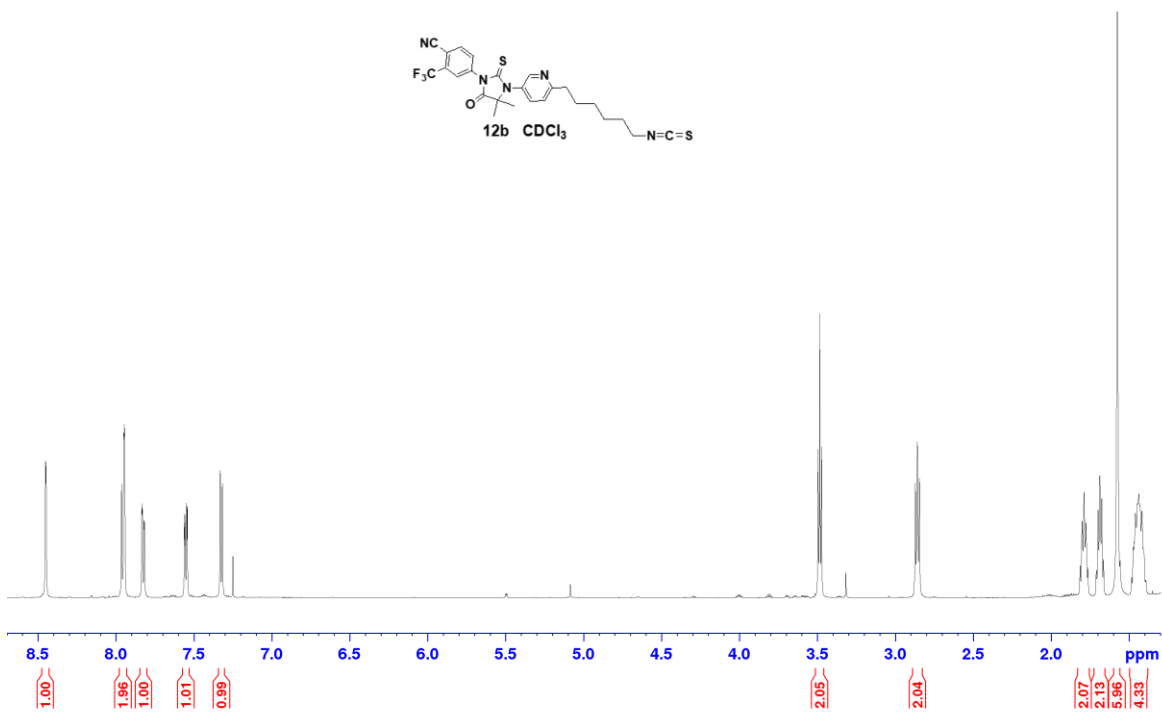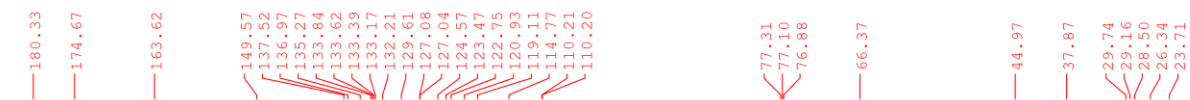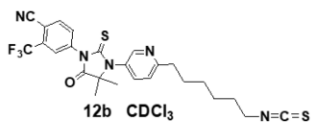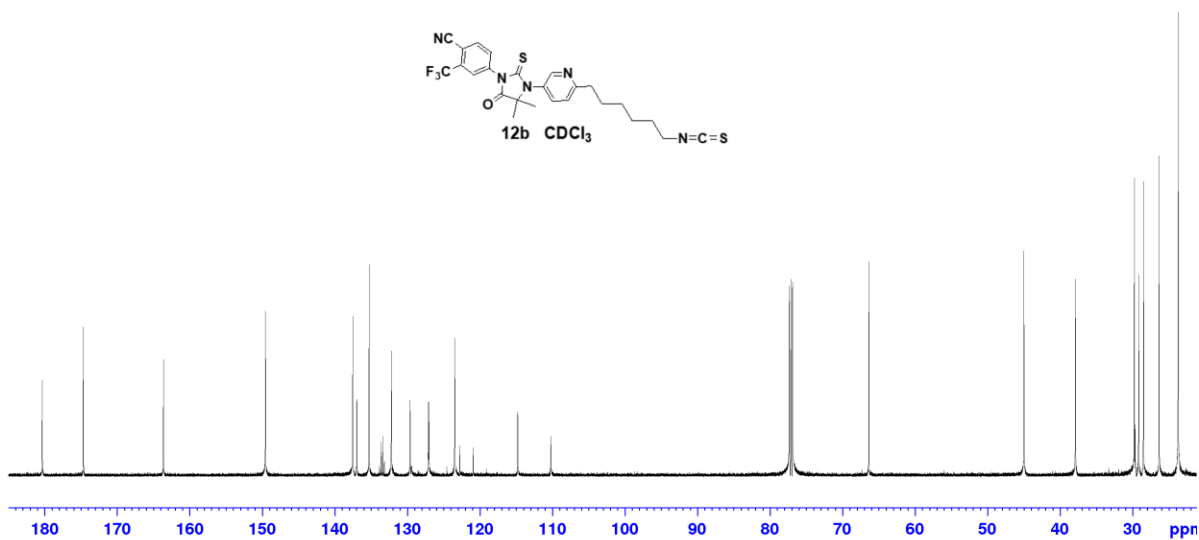

151002\_0232 574 (10.593) Cm (574:655-159:245x2.000)

TOF MS ES+  
4.33e5

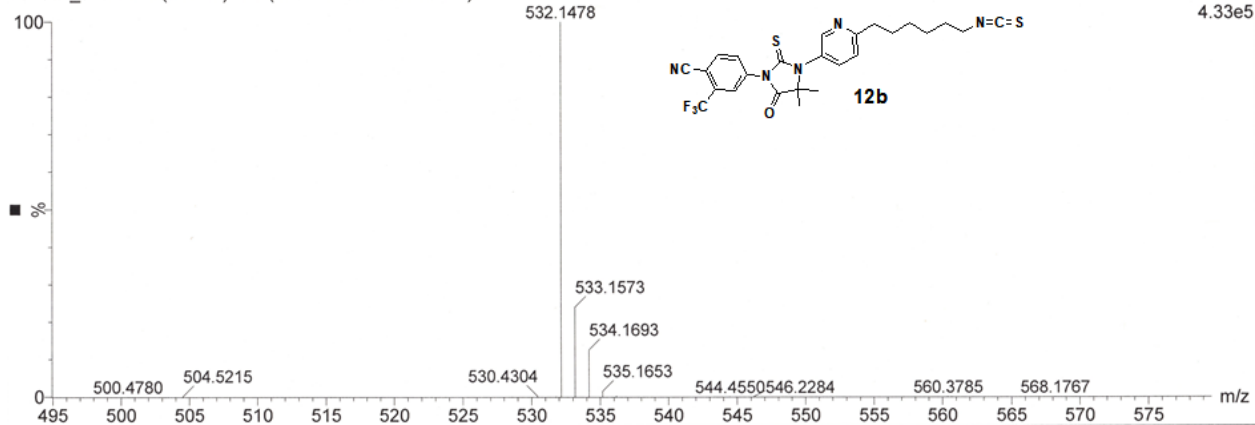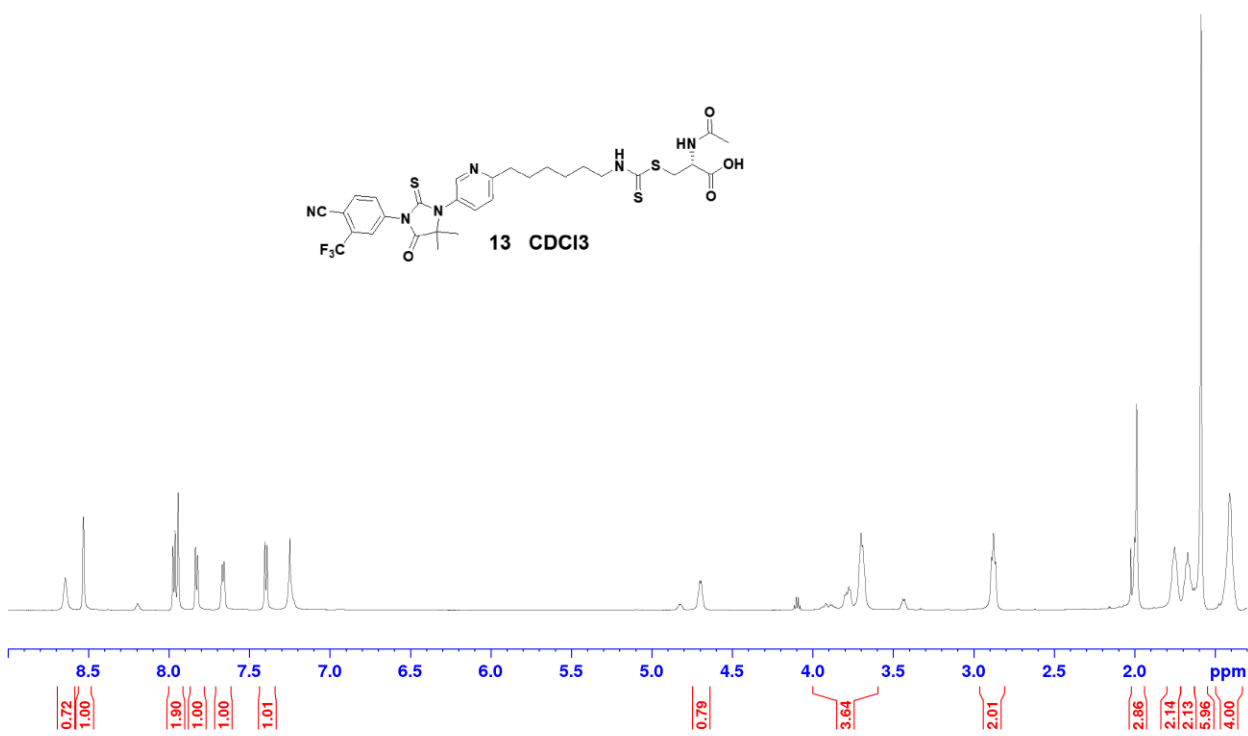

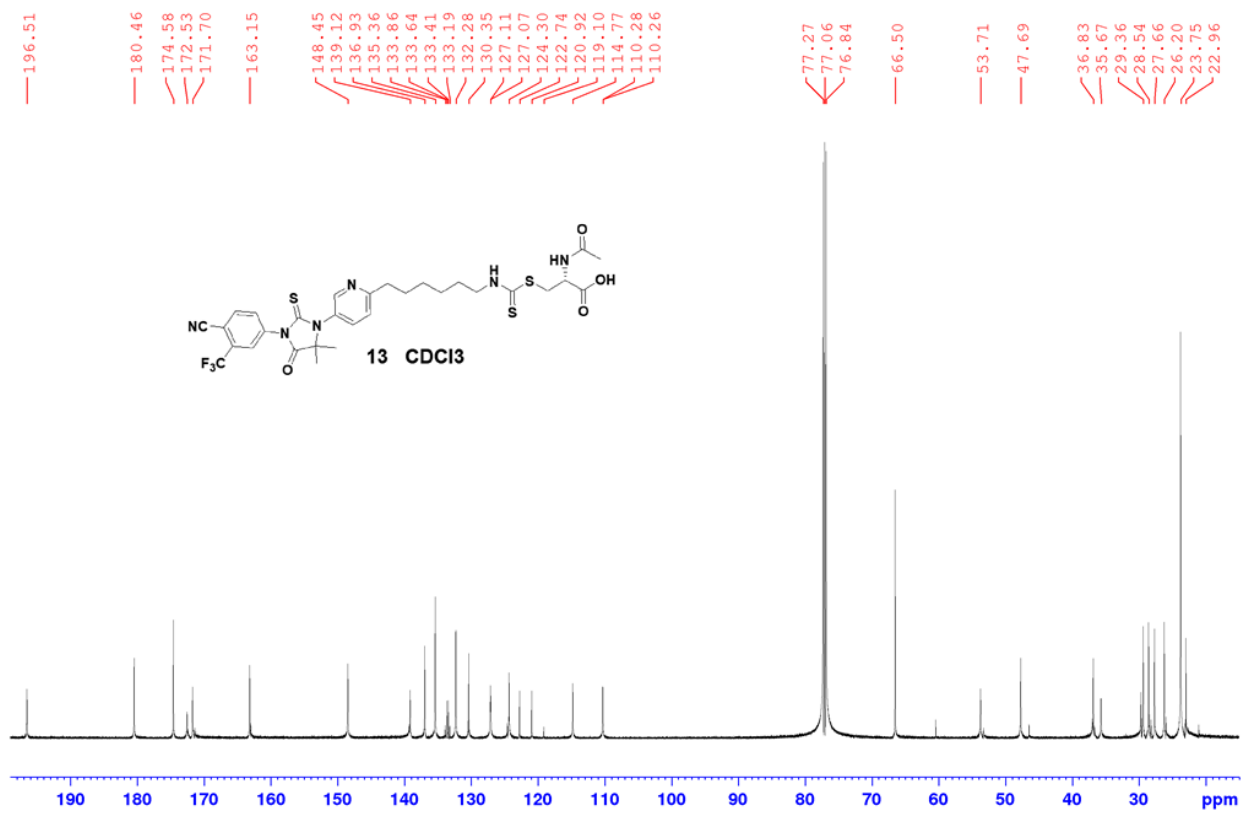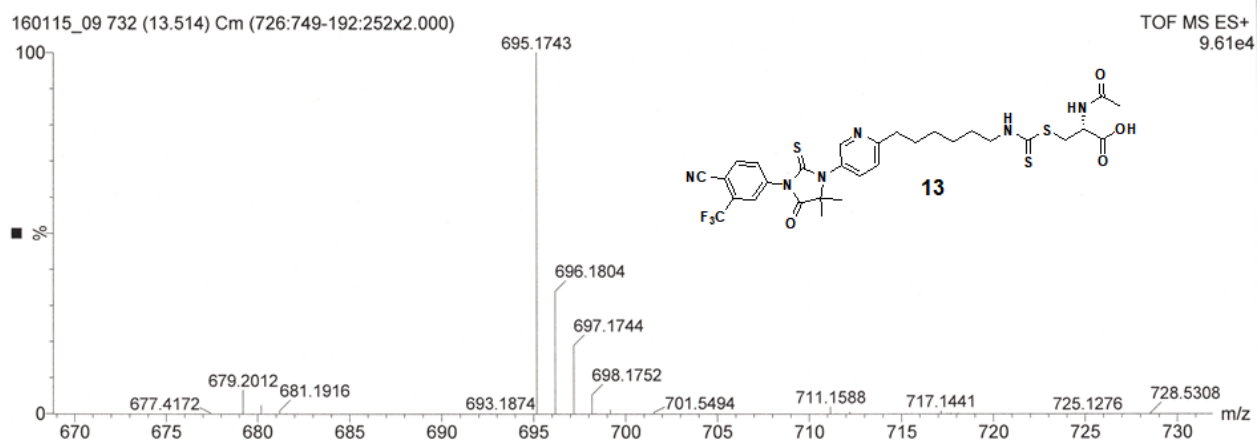

Supplement: NIHMS1704684-supplement-Supplement.pdf [file NIHMS1704684-supplement-Supplement.pdf]
